# Supplementary material for: Cold Enrichment Methods for the Detection of Foodborne Yersiniosis: Friend or Foe?
Source: MDPI journal article supplement (doi:10.3390/pathogens11020278), 2022-02-21
Supplement: s1 [file s1]

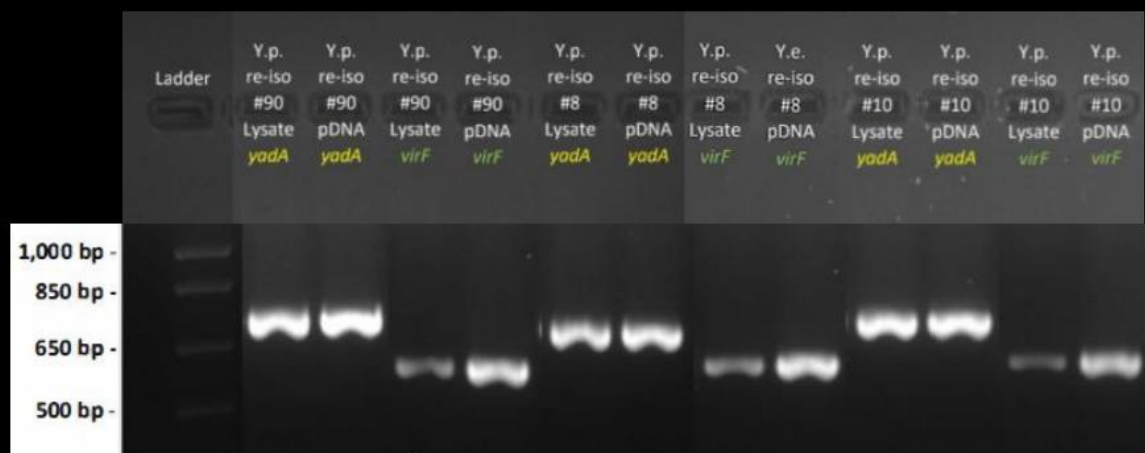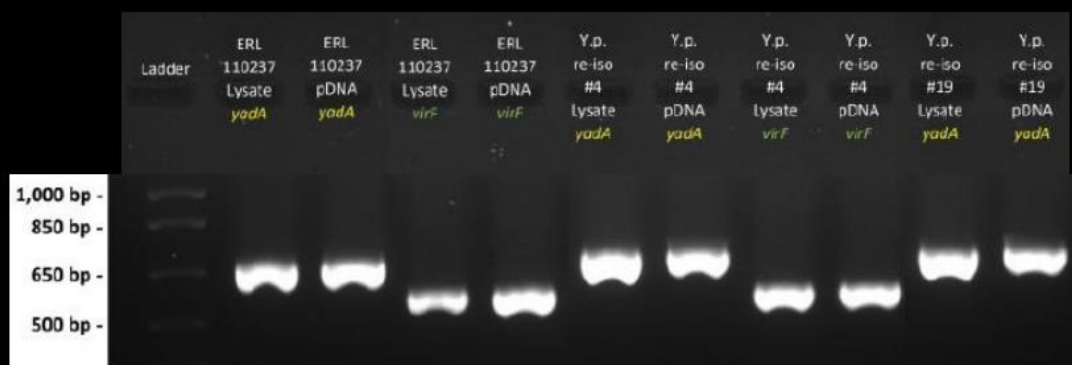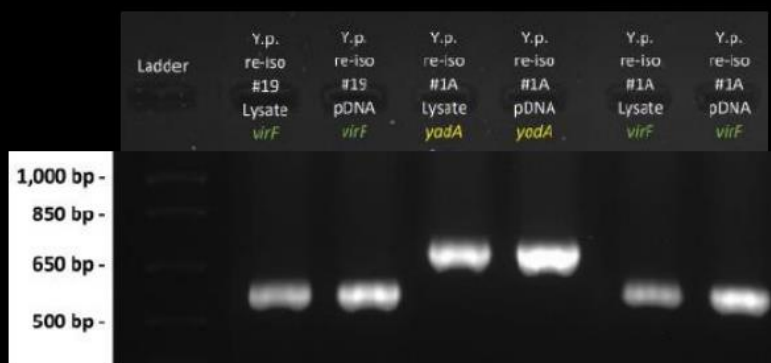

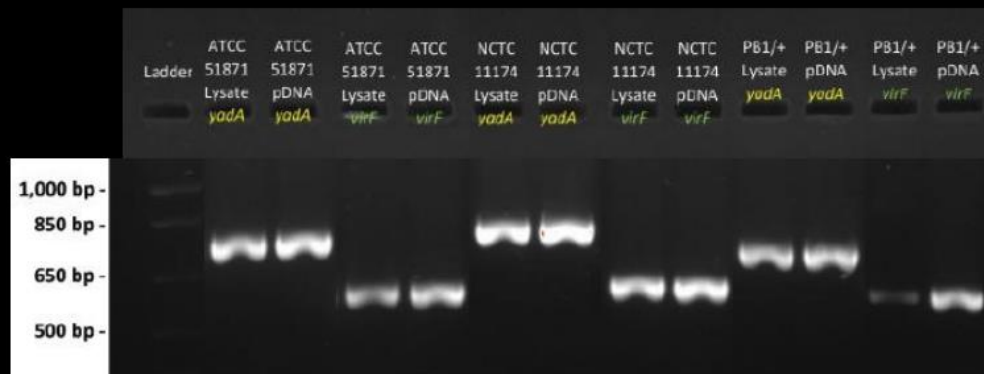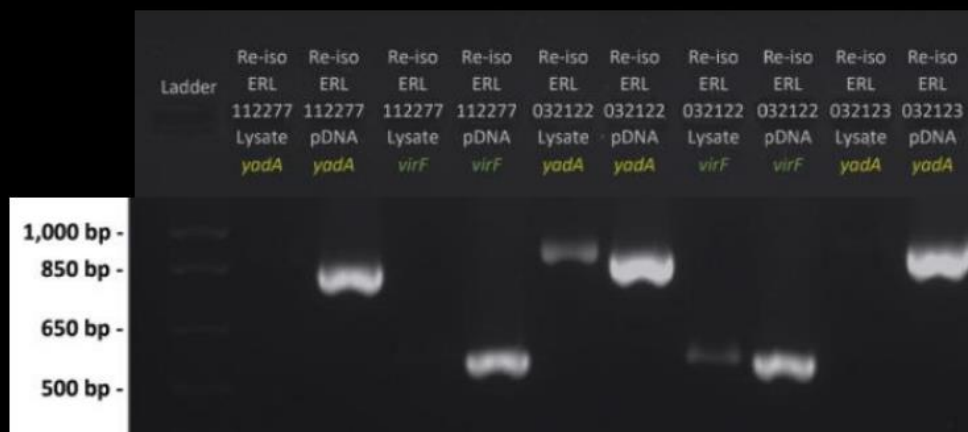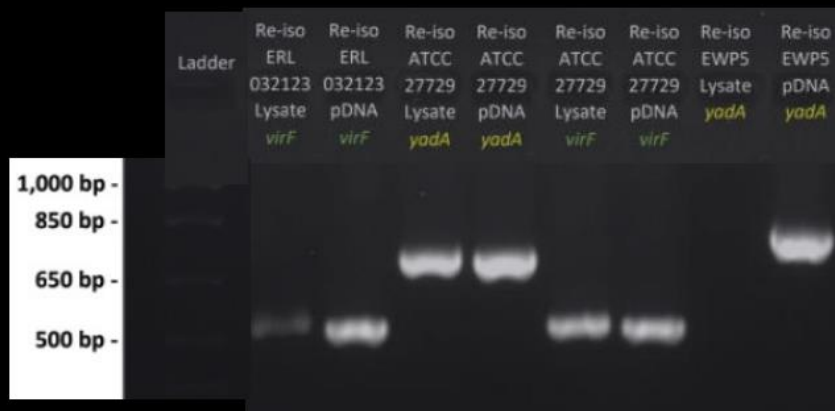

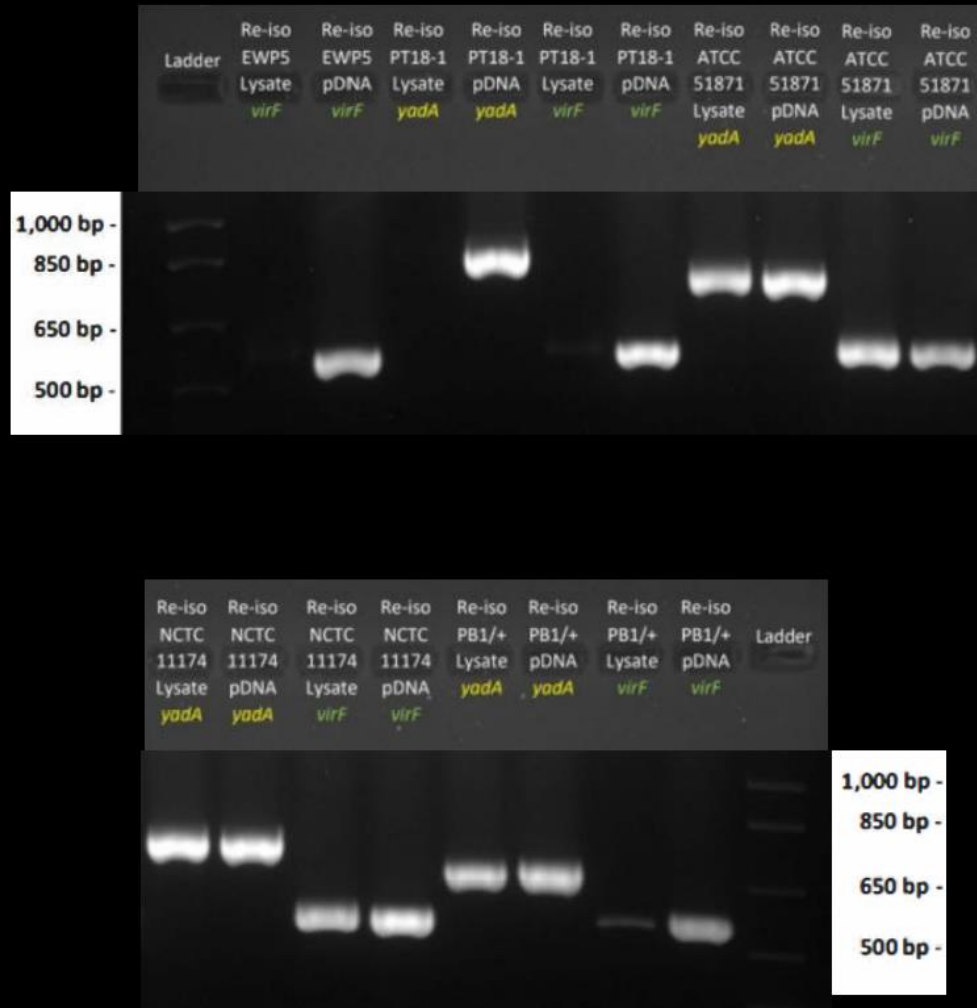

Figure S1. PCR analyses of heated lysates and purified plasmid DNA for the presence of virulence marker genes *yadA* and *virF*.
